# Supplementary material for: Knockdown of the partner protein OsNAR2.1 for high-affinity nitrate transport represses lateral root formation in a nitrate-dependent manner
Source: PubMed Central journal article supplement (PMC4672285; doi:10.1038/srep18192), 2015-12-08
Supplement: srep18192-s1.pdf [file srep18192-s1.pdf]

## **Supplementary information**

### **Knockdown of the partner protein OsNAR2.1 for high-affinity nitrate transport represses lateral root formation in a nitrate-dependent manner**

**Shuangjie Huang\*, Si Chen\*, Zhihao Liang, Chenming Zhang, Ming Yan, Jinguang  
Chen, Guohua Xu, Xiaorong Fan<sup>+</sup> & Yali Zhang<sup>+</sup>**

State Key Laboratory of Crop Genetics and Germplasm Enhancement, Key Laboratory of  
Plant Nutrition and Fertilization in Low-Middle Reaches of the Yangtze River, Ministry of  
Agriculture, Nanjing Agricultural University, Nanjing 210095, P.R. China

\*These authors contributed to this work equally.

**Correspondence and requests for materials should be addressed to X.R.F.  
([xiaorongfan@njau.edu.cn](mailto:xiaorongfan@njau.edu.cn)) and Y.L.Z. ([ylzhang@njau.edu.cn](mailto:ylzhang@njau.edu.cn))**

**SupplementaryTable S1 The primers for qRT-PCR of OsPIN family genes**

| Gene            | Primer sequence                                                  |
|-----------------|------------------------------------------------------------------|
| <i>OsPIN1a</i>  | 5'-TCATCTGGTCGCTCGTCTGC-3'<br>5'-CGAACGTCGCCACCTTGTTTC-3'        |
| <i>OsPIN1b</i>  | 5'-TGCACCCTAGCATTCTCAGCA-3'<br>5'-CCCTCCTCCCAAATTCTACTT-3'       |
| <i>OsPIN1c</i>  | 5'-CCGTCAGGTTCTCGTGGGT-3'<br>5'-TCACGGCTGTGCTCAGAATG-3'          |
| <i>OsPIN1d</i>  | 5'-GATTCCGACGTCGTCTCGCTCG-3'<br>5'-GTCGGGTTCCGCGACGACTGCA-3'     |
| <i>OsPIN2</i>   | 5'-CAACACCTACTCCAGCCTC-3'<br>5'-TGGACCAGTCAAGAACCTC-3'           |
| <i>OsPIN5a</i>  | 5'-GGGGCTGGTGCTAAAGTTCG-3'<br>5'-TGAGGTAGGGCTGCCTGTATG-3'        |
| <i>OsPIN5b</i>  | 5'-GGGCAGCAGGAGAGGGTGATAG-3'<br>5'-GAATCGGCAGAGAGATCAATGT-3'     |
| <i>OsPIN5c</i>  | 5'-CTTCACCGCCGACCAGTGCGAC-3'<br>5'-GTGATGCACCACGAGAACCCGC-3'     |
| <i>OsPIN8</i>   | 5'-GTTCCACTATATGTAGCTATGATAC-3'<br>5'-CAGTCAAACCTTCTCTGCACAGC-3' |
| <i>OsPIN9</i>   | 5'-GATACAAGATAGCGTCGTTCTC-3'<br>5'-ATGATGTCTGCGTGGACCT-3'        |
| <i>OsPIN10a</i> | 5'-GTTGGATTGAGATAGGCTGAGGAG-3'<br>5'-ATGGCGACGAAGCGGTTGAT-3'     |
| <i>OsPIN10b</i> | 5'-TCCGATGCAGGGTTAGGC-3'<br>5'-AGGATGGTAGCGTGGAGGTT-3'           |

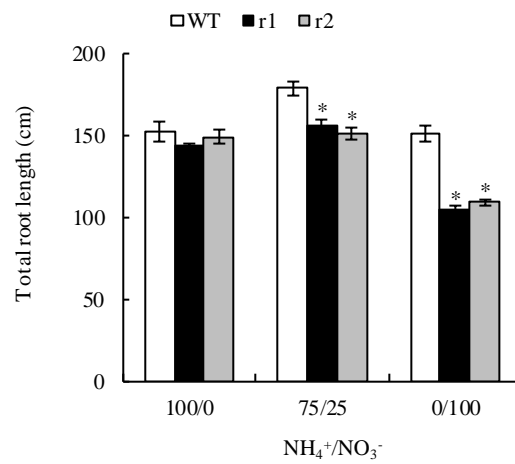

**Supplementary Figure S1.** Root morphology of the wild-type (WT) and *osnar2.1* knockdown lines (r1 and r2) under three NH<sub>4</sub><sup>+</sup>/NO<sub>3</sub><sup>-</sup> ratios at a total N concentration of 0.2 mM. Total root length was measured after the seedlings were grown for 1 wk in hydroponic media containing three ratios of NH<sub>4</sub><sup>+</sup>/NO<sub>3</sub><sup>-</sup>. Values are means ± SE (n = 6). \*, P < 0.05 (ANOVA) comparing WT plants and two mutant lines in the same treatment.

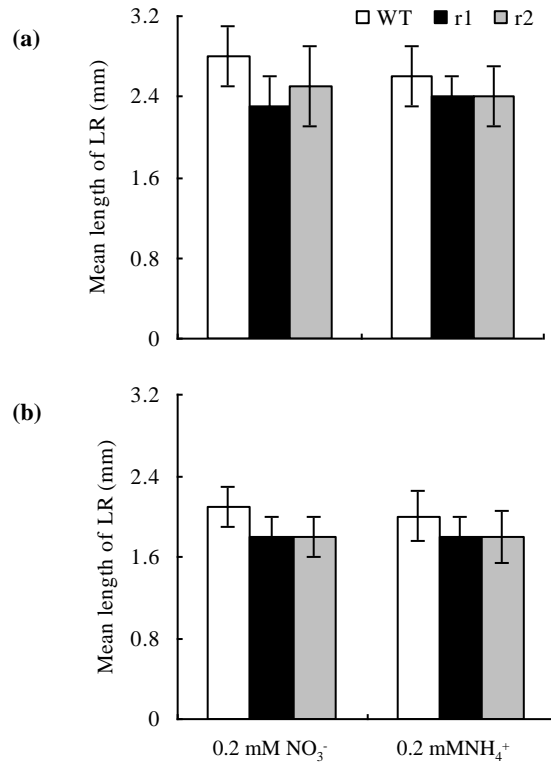

**Supplementary Figure S2.** Mean length of lateral root (LR) in seminal (a) and adventitious (b) roots in wild-type (WT) and *osnar2.1* knockdown lines (r1 and r2). Rice seedlings were grown for 1 wk in hydroponic media containing 0.2 mM NO<sub>3</sub><sup>-</sup> or NH<sub>4</sub><sup>+</sup>. Values are means  $\pm$  SE (n=6).

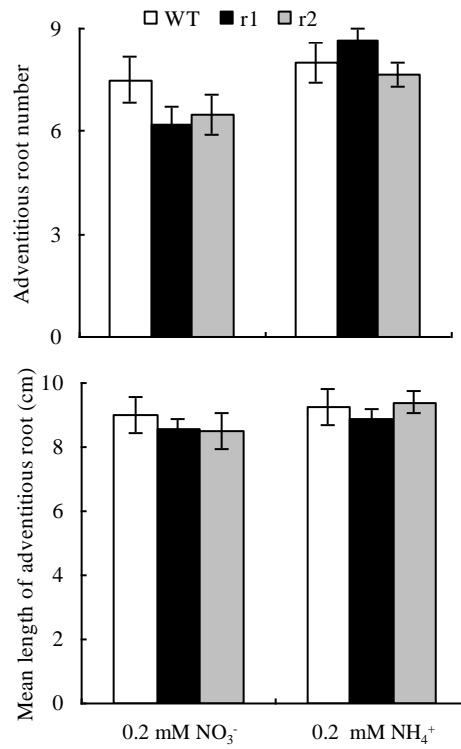

**Supplementary Figure S3.** Adventitious root number and mean adventitious root length in the wild-type (WT) and *osnar2.1* knockdown lines (r1 and r2). Rice seedlings were grown for 1 wk in hydroponic media containing 0.2 mM NO<sub>3</sub><sup>-</sup> or NH<sub>4</sub><sup>+</sup>. Values are means ± SE (n=6).
